# Supplementary material
Source: PubMed Central journal article supplement (PMC7755092)
Supplement: ciz1027_suppl_supplementary_fig_1.pdf [file ciz1027_suppl_supplementary_fig_1.pdf]

**A**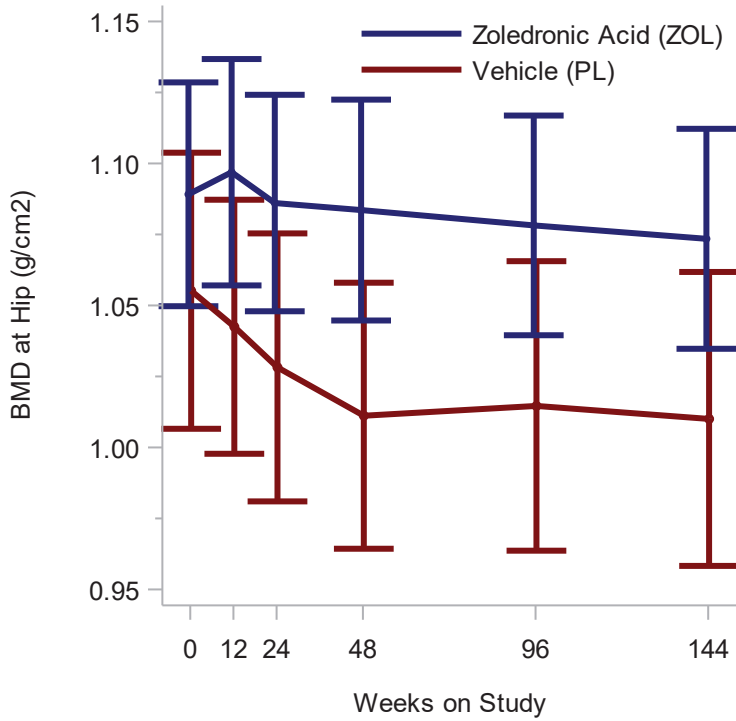

|                   |           |           |           |           |           |           |
|-------------------|-----------|-----------|-----------|-----------|-----------|-----------|
| <b>ART+ZOL(n)</b> | <b>32</b> | <b>29</b> | <b>27</b> | <b>26</b> | <b>27</b> | <b>29</b> |
| <b>ART+PL (n)</b> | <b>29</b> | <b>24</b> | <b>23</b> | <b>23</b> | <b>21</b> | <b>20</b> |

**B**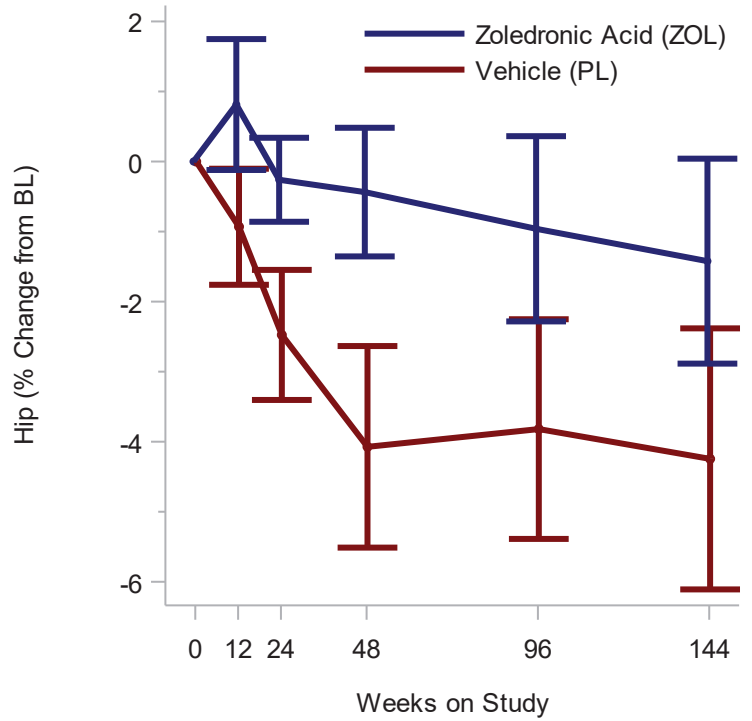

|                   |           |           |           |           |           |           |
|-------------------|-----------|-----------|-----------|-----------|-----------|-----------|
| <b>ART+ZOL(n)</b> | <b>32</b> | <b>27</b> | <b>25</b> | <b>24</b> | <b>25</b> | <b>27</b> |
| <b>ART+PL(n)</b>  | <b>29</b> | <b>24</b> | <b>23</b> | <b>23</b> | <b>21</b> | <b>20</b> |

**C**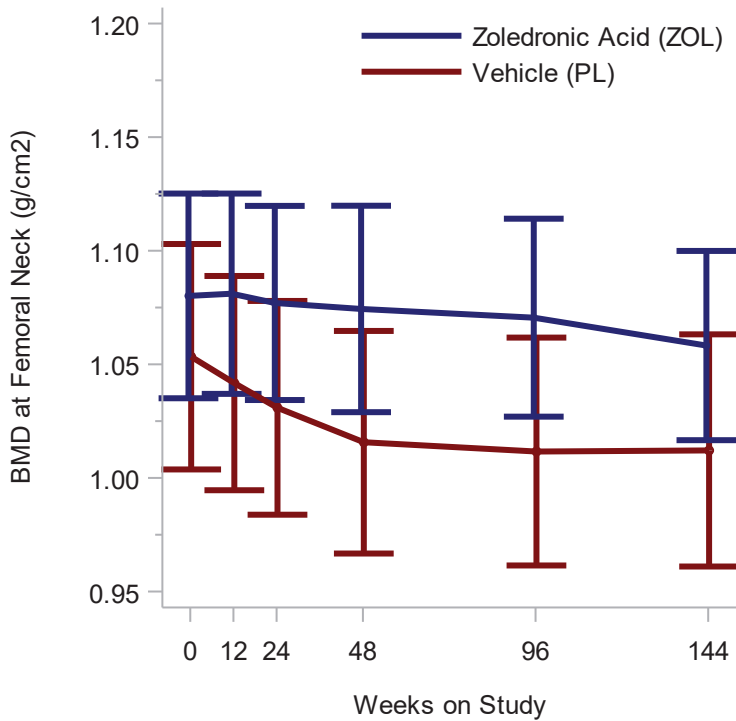

|                   |           |           |           |           |           |           |
|-------------------|-----------|-----------|-----------|-----------|-----------|-----------|
| <b>ART+ZOL(n)</b> | <b>32</b> | <b>29</b> | <b>27</b> | <b>26</b> | <b>27</b> | <b>29</b> |
| <b>ART+PL(n)</b>  | <b>29</b> | <b>24</b> | <b>23</b> | <b>23</b> | <b>21</b> | <b>20</b> |

**D**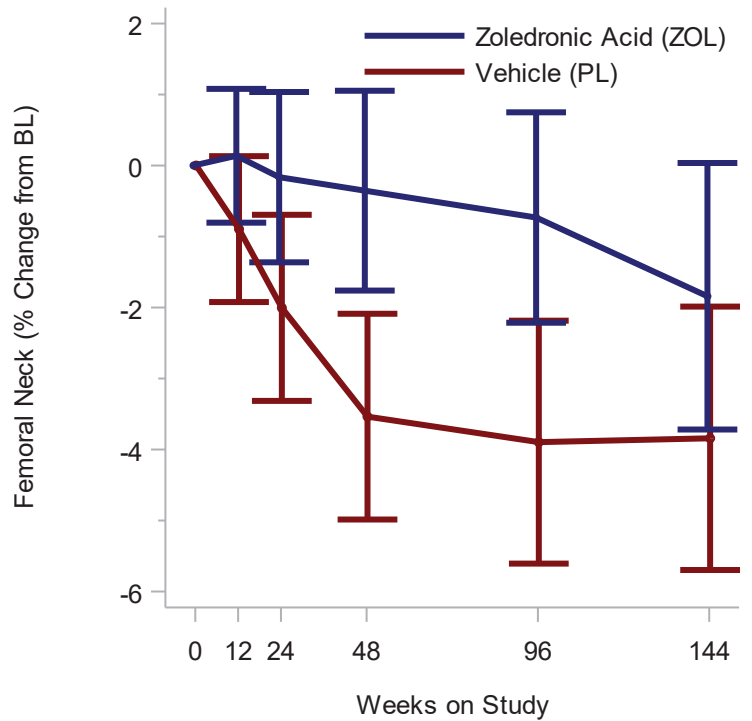

|                   |           |           |           |           |           |           |
|-------------------|-----------|-----------|-----------|-----------|-----------|-----------|
| <b>ART+ZOL(n)</b> | <b>32</b> | <b>27</b> | <b>25</b> | <b>24</b> | <b>25</b> | <b>27</b> |
| <b>ART+PL(n)</b>  | <b>29</b> | <b>24</b> | <b>23</b> | <b>23</b> | <b>21</b> | <b>20</b> |
