# Supplementary material
Source: PubMed Central journal article supplement (PMC7755092)

**A**

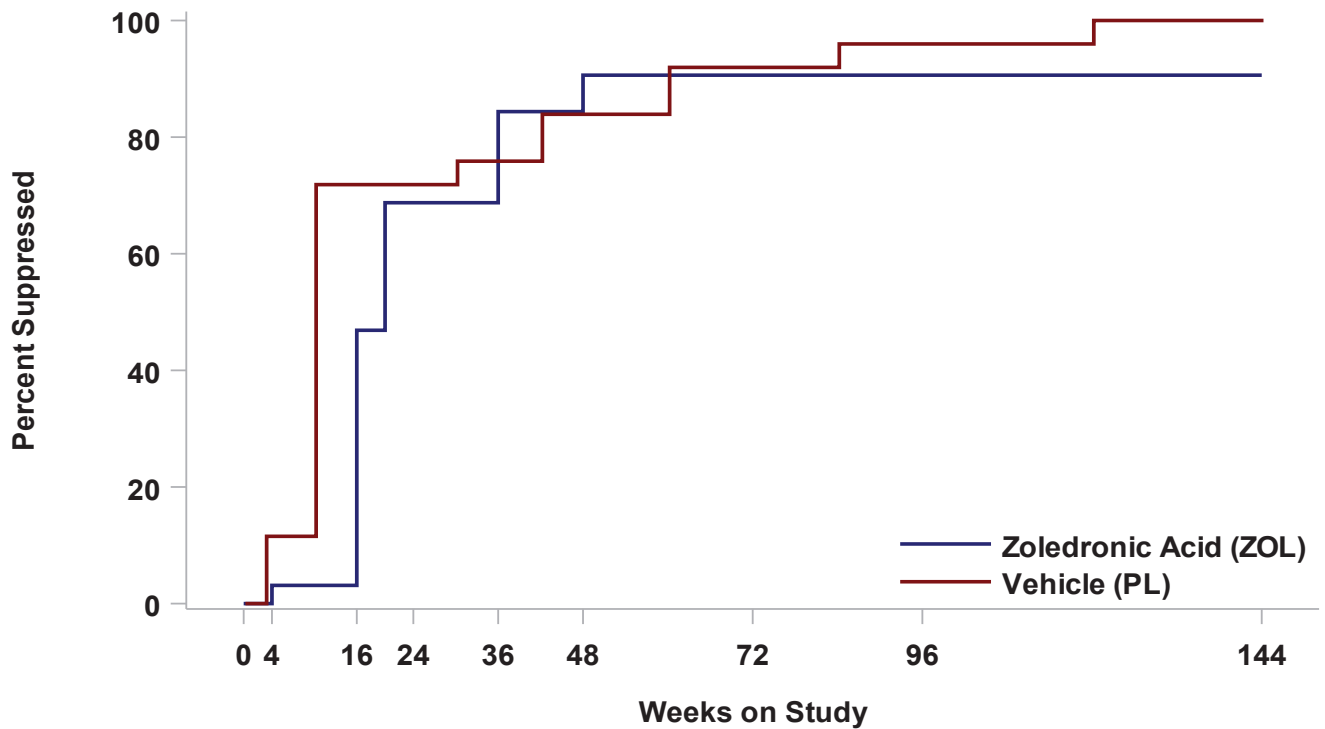

|            | 0    | 4  | 16 | 24 | 36 | 48 | 72 | 96 | 144 |
|------------|------|----|----|----|----|----|----|----|-----|
| ART+ZOL(n) | 3331 | 17 | 10 | 5  | 3  | 3  | 3  | 3  | 0   |
| ART+PL(n)  | 2723 | 7  | 7  | 6  | 4  | 2  | 1  | 1  | 0   |

**B**

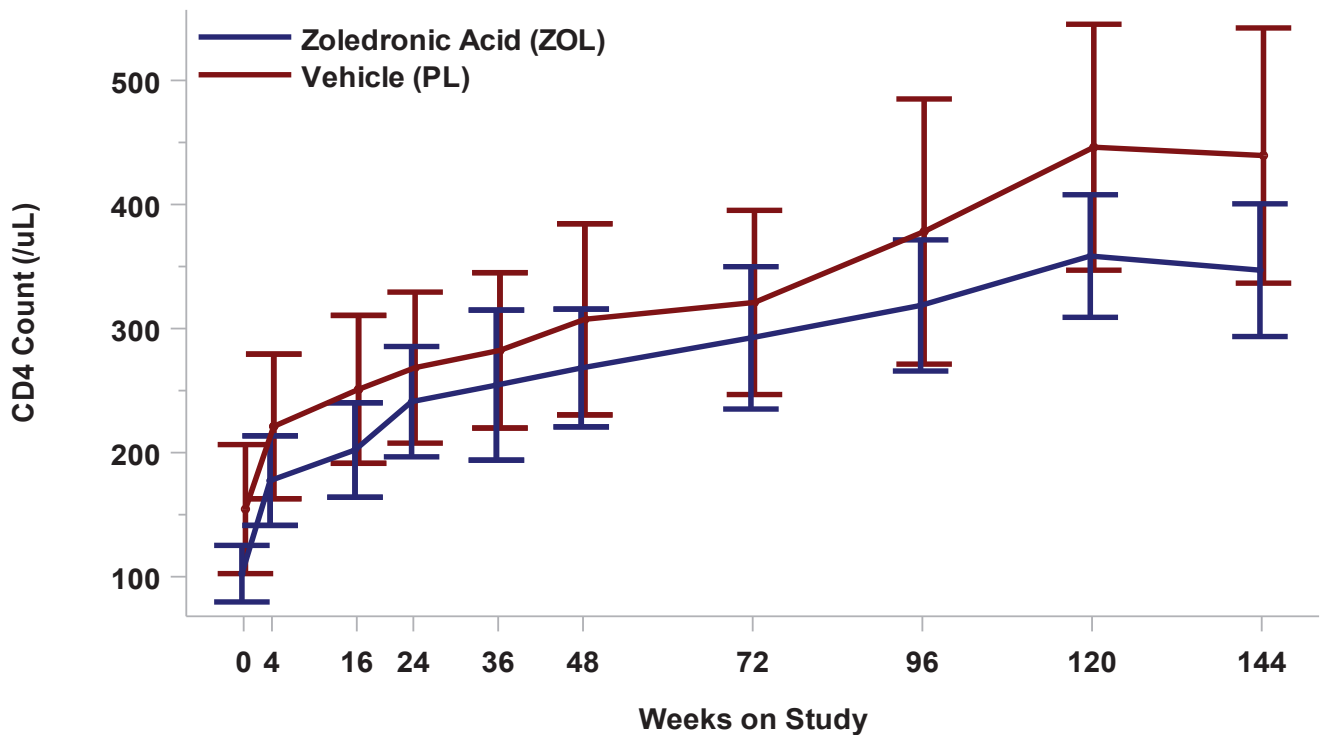

|            | 0    | 4  | 16 | 24 | 36 | 48 | 72 | 96 | 120 | 144 |
|------------|------|----|----|----|----|----|----|----|-----|-----|
| ART+ZOL(n) | 3431 | 30 | 31 | 27 | 27 | 27 | 27 | 28 | 23  | 31  |
| ART+PL(n)  | 2926 | 25 | 24 | 24 | 24 | 24 | 22 | 25 | 20  | 22  |

Supplement: ciz1027_suppl_supplementary_fig_2.pdf [file ciz1027_suppl_supplementary_fig_2.pdf]
